# Supplementary material for: Galicia perante os desafios dos noventa
Source: Springer Nature journal article supplement (doi:10.1186/s13046-016-0470-4), 1991-01-01
Supplement: MOESM1 [file 12003678]

Additional Table S1

| Mice             | WBC<br>(10 <sup>3</sup> /μL) | RBC<br>(10 <sup>6</sup> /μL) | HGB<br>(g/dl) | PCV<br>(%) | MCV<br>(u) | MCH<br>(pg) | MCHC<br>(%) | Platelets<br>(10 <sup>3</sup> /μL) |
|------------------|------------------------------|------------------------------|---------------|------------|------------|-------------|-------------|------------------------------------|
| <b>Drug 1</b>    | 3.48                         | 8.68                         | 12.6          | 44.0       | 50.7       | 14.5        | 28.6        | 852                                |
| <b>Drug 2</b>    | 3.52                         | 7.64                         | 11.2          | 37.2       | 48.7       | 14.7        | 30.1        | 820                                |
| <b>Drug 3</b>    | 1.30                         | 8.07                         | 12.1          | 38.1       | 47.2       | 15.0        | 31.8        | 610                                |
| <b>Drug 4</b>    | 2.50                         | 7.46                         | 10.9          | 36.6       | 49.0       | 14.6        | 28.8        | 767                                |
| <b>Drug 5</b>    | 1.02                         | 7.60                         | 12.0          | 38.0       | 50.0       | 15.8        | 31.6        | 620                                |
| <b>Control 1</b> | 4.72                         | 8.63                         | 13.2          | 43.3       | 50.2       | 15.3        | 30.5        | 1107                               |
| <b>Control 2</b> | 2.76                         | 7.07                         | 10.5          | 35.6       | 50.4       | 14.9        | 29.5        | 720                                |
| <b>Control 3</b> | 4.14                         | 8.57                         | 13.0          | 43.6       | 50.9       | 15.2        | 29.8        | 677                                |
| <b>Control 4</b> | 5.38                         | 8.56                         | 13.2          | 44.6       | 52.1       | 15.4        | 29.6        | 771                                |
| <b>Control 5</b> | 6.72                         | 8.94                         | 13.2          | 43.8       | 49.0       | 14.8        | 30.1        | 1673                               |

**Table S1. Combined SW IV-134 and gemcitabine therapy induces a moderate decrease in WBC count and has no effect on the other CBC parameters in A thymic nude mice.** CBC of Athymic Nude mice treated daily with SW IV-134 and weekly gemcitabine for 3 weeks compared to vehicle (control). WBC is reduced in the drug group, with mean= 2.4 compared to 4.7 in the control group p = 0.02. The differences in the rest of cell counts between the 2 groups are not statistically significant.
