# Supplementary material for: Galicia perante os desafios dos noventa
Source: Springer Nature journal article supplement (doi:10.1186/s13046-016-0470-4), 1991-01-01
Supplement: MOESM2 [file 12003678]

Additional Table S2

| <b>Mice</b> | <b>BUN<br/>(mg/dL)</b> | <b>Creatinine<br/>(mg/dL)</b> | <b>ALT<br/>(u/L)</b> | <b>AST<br/>(u/L)</b> | <b>T. Bili<br/>(mg/dL)</b> | <b>Glucose<br/>(mg/dL)</b> | <b>Total<br/>Protein<br/>(g/dL)</b> |
|-------------|------------------------|-------------------------------|----------------------|----------------------|----------------------------|----------------------------|-------------------------------------|
| Drug 1      | 41                     | 0.36                          | 68                   | 52                   | 0.10                       | 181                        | 5.7                                 |
| Drug 2      | 41                     | 0.33                          | 63                   | 77                   | 0.06                       | 114                        | 4.8                                 |
| Drug 3      | 38                     | 0.32                          | 84                   | 121                  | 0.07                       | 219                        | 5.4                                 |
| Drug 4      | 39                     | 0.27                          | 54                   | 62                   | 0.17                       | 140                        | 5.6                                 |
| Drug 5      | 35                     | 0.26                          | 52                   | 72                   | 0.11                       | 153                        | 5.5                                 |
| Control 1   | 46                     | 0.37                          | 69                   | 61                   | 0.13                       | 162                        | 5.5                                 |
| Control 2   | 35                     | 0.33                          | 57                   | 58                   | 0.12                       | 170                        | 5.3                                 |
| Control 3   | 34                     | 0.37                          | 59                   | 55                   | 0.13                       | 195                        | 5.8                                 |
| Control 4   | 33                     | 0.27                          | 62                   | 189                  | 0.08                       | 168                        | 5.3                                 |
| Control 5   | 28                     | 0.27                          | 48                   | 54                   | 0.14                       | 221                        | 5.5                                 |

**Table S2. Combined SW IV-134 and gemcitabine therapy does not induce changes in serum chemistries in tumor-bearing mice.** Biochemical analysis of CBC of Athymic Nude mice treated daily with SW IV-134 and weekly gemcitabine for 3 weeks compared to vehicle (control). The differences in laboratory values between the 2 groups are not statistically significant.
